# Supplementary material for: Reversible on/off switching of photochromic properties in N-salicylideneaniline co-crystals by heating and humidification
Source: Royal Society of Chemistry journal article supplement (doi:10.1039/c9ce00442d), 2019-01-01
Supplement: c9ce00442d1.pdf [file c9ce00442d1.pdf]

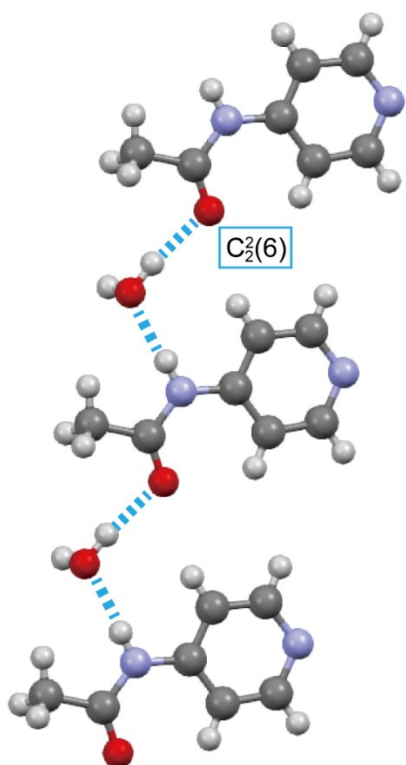

**Figure S1** Chain hydrogen-bond motif of  $C_2(6)$  between water and co-former molecules in **1H**.

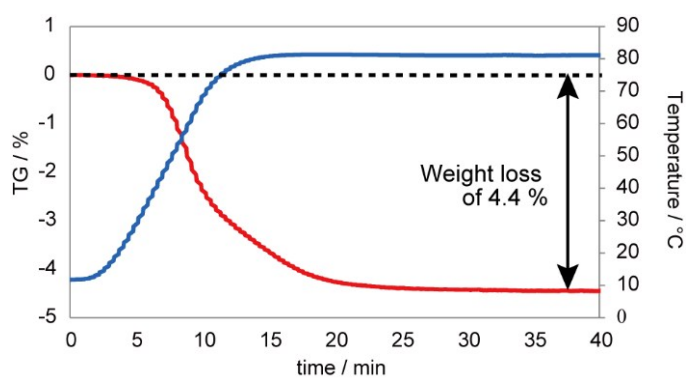

**Figure S2** TG analysis data of the monohydrated co-crystal **1H**. The blue line represents temperature and the red line shows the change in sample weight. The weight loss of 4.4 wt.% agrees with the theoretical value of 4.6 wt.% for one water molecule.

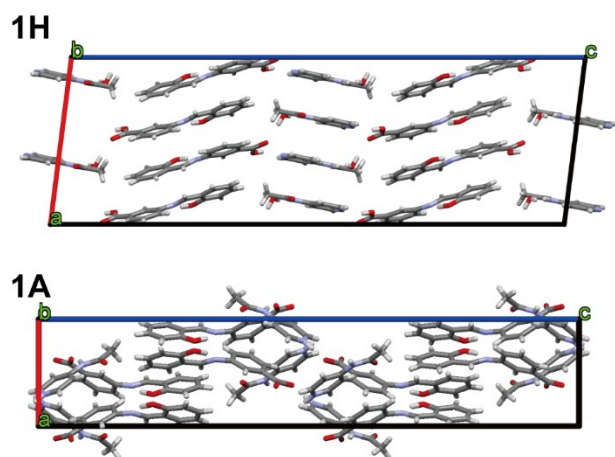

Figure S3 Crystal packing of **1H** (top) and **1A** (bottom).

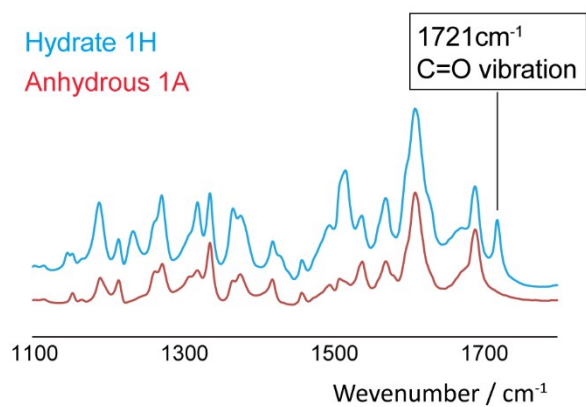

Figure S4 IR spectra of **1H** and **1A**. The absorption peak related to C=O vibration was observed in **1H**.
